# Supplementary material for: Synthesis and Thermoelectric Properties of Selenium Nanoparticles Coated with PEDOT:PSS
Source: PubMed Central journal article supplement (PMC6631964; doi:10.3390/polym11061052), 2019-06-17
Supplement: polymers-11-01052-s001.pdf [file polymers-11-01052-s001.pdf]

## Supporting Information

### **Synthesis and Thermoelectric Properties of Selenium Nanoparticles coated with PEDOT:PSS**

Chingu Kim, Jiyeon Hong, and Ji-Woong Park \*

School of Materials Science and Engineering and Research Institute for Solar and Sustainable Energies (RISE), Gwangju Institute of Science and Technology (GIST), 123, Cheomdan-gwagiro, Buk-gu, Gwangju 61005, Korea.

E-mail: [jiwoong@gist.ac.kr](mailto:jiwoong@gist.ac.kr)

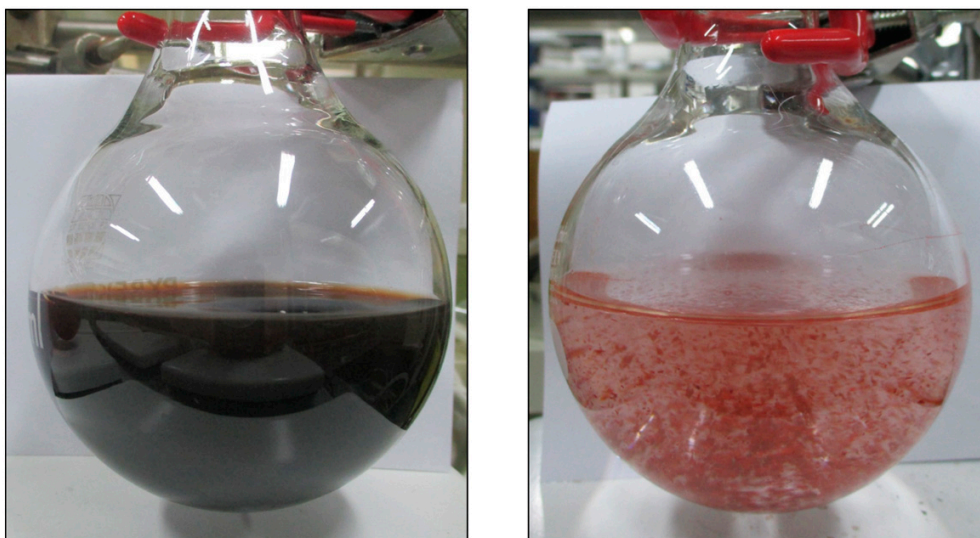

**Fig. S1.** Photographs of reaction mixtures with or without PEDOT:PSS (left and right, respectively).

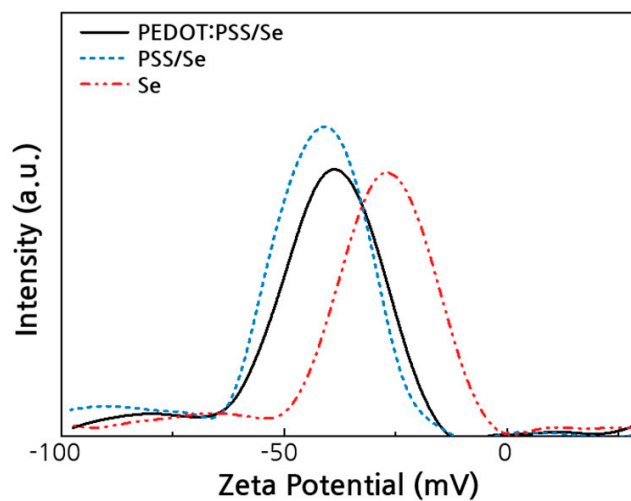

**Fig. S2.** Zeta potential distributions of PEDOT:PSS/Se, PSS/Se, Se particles dispersed aqueous solutions.

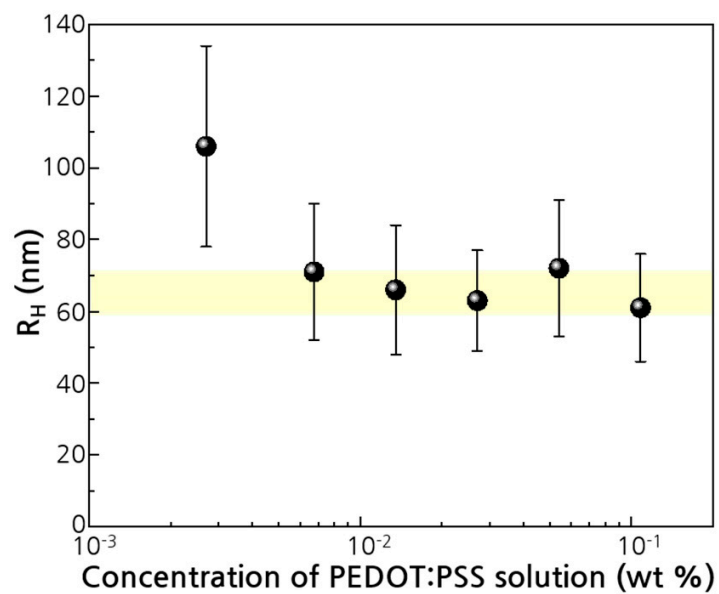

**Fig. S3.** Hydrodynamic radius of PEDOT:PSS/Se particles synthesized with different concentration of PEDOT:PSS solution. The yellow shade indicates the  $R_H$  from 60 to 70 nm.

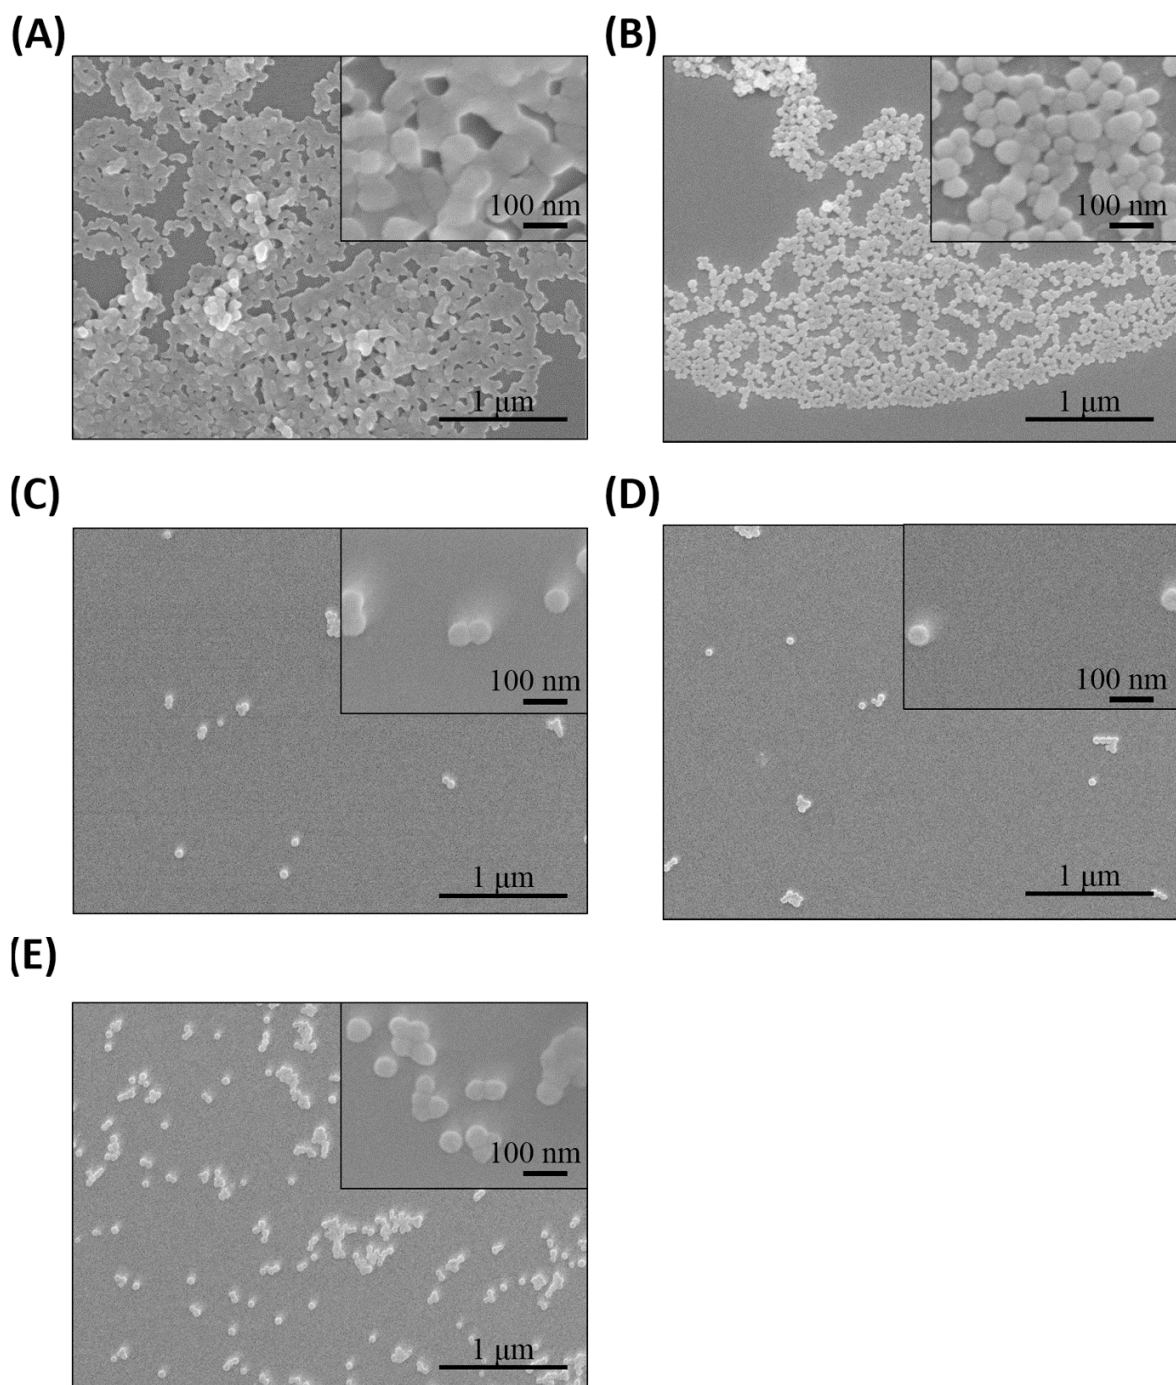

**Fig. S4.** SEM images of the PEDOT:PSS/Se particles synthesized with different concentration of PEDOT:PSS solution. (A)  $2.7 \times 10^{-3} \%$ . (B)  $6.75 \times 10^{-3} \%$ . (B)  $1.35 \times 10^{-2} \%$ . (B)  $5.4 \times 10^{-2} \%$ . (B)  $1.08 \times 10^{-1} \%$ .

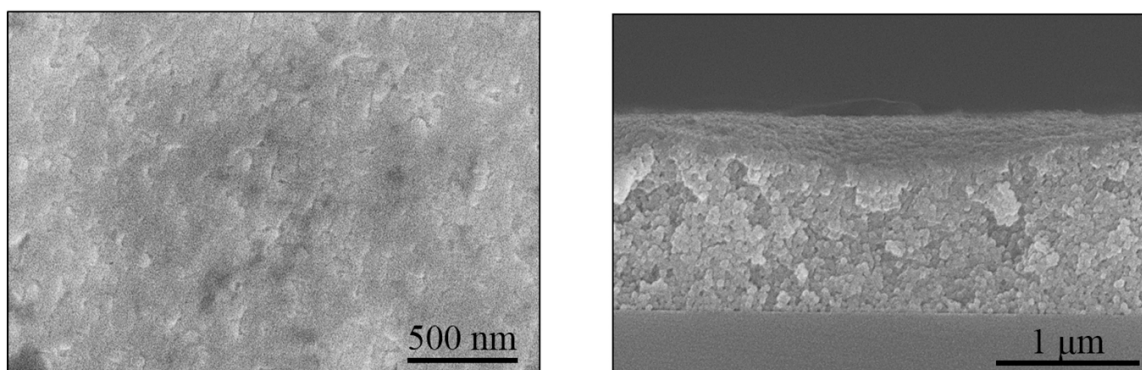

**Fig. S5.** SEM images of top surface (left) and cross-section (right) of PEDOT:PSS/Se film.

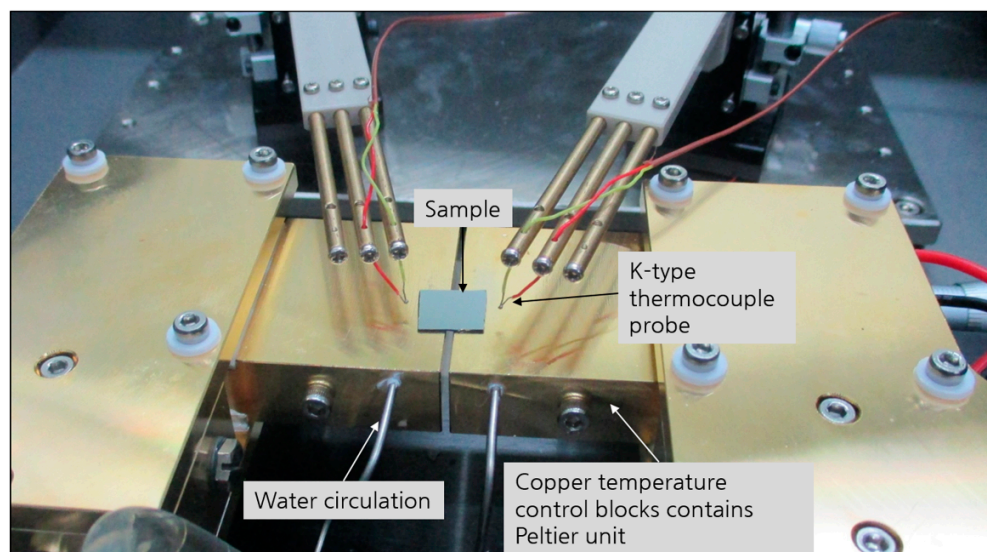

**Fig. S6.** Seebeck measurement set-up. Seebeck voltage was measured at different temperatures.

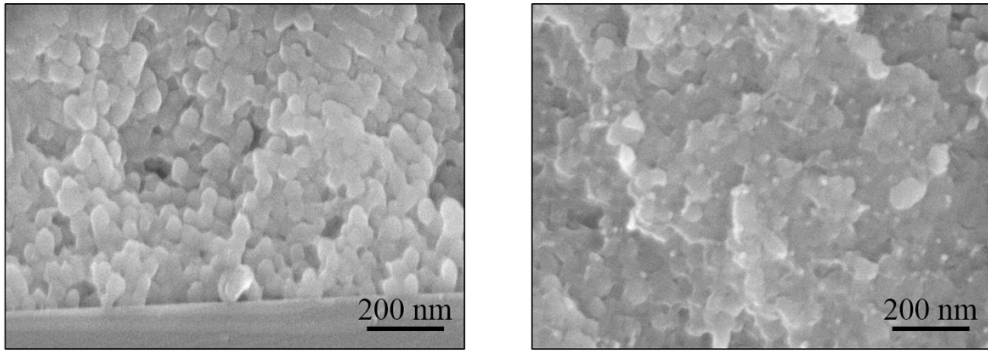

**Fig. S7.** SEM images of cross-sections of the composite films of about 4% (left) and 10% polymer compositions (right).

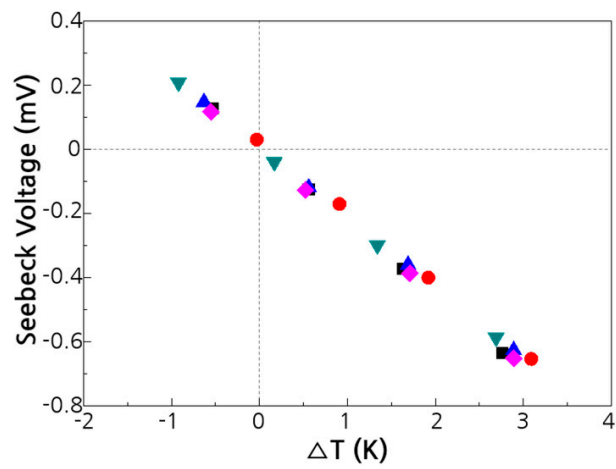

**Fig. S8.** Measurement of Seebeck voltage at different temperatures of a standard sample ( $\text{Bi}_2\text{Te}_3$  bar) five times.

**Table S1.** Polymer content estimated from elemental analysis of PEDOT:PSS/Se composite.

|                                        | C    | H    | O    | S    | Total |
|----------------------------------------|------|------|------|------|-------|
| Measured (%)                           | 1.99 | -    | -    | 0.87 |       |
| Estimated <sup>a</sup> (on C basis, %) | 1.99 | 0.15 | 0.96 | 0.73 | 3.8   |
| (on S basis, %)                        | 2.39 | 0.18 | 1.16 | 0.87 | 4.6   |

<sup>a</sup> The calculation was made based on following assumptions. 1) The weight ratio of PEDOT/PSS (Clevios PH 1000, Heraeus) is 1/2.5. 2) Degree of sulfonation of PSS is 100 %.

**Table S2.** Room temperature thermoelectric properties of PEDOT:PSS/Se films which were thermally annealed at different temperatures.

| Annealing Temperature (T) / °C | Electrical Conductivity ( $\sigma$ ) / S cm <sup>-1</sup> | Seebeck Coefficient (S) / $\mu$ V K <sup>-1</sup> | Power Factor (S <sup>2</sup> $\sigma$ ) / $\mu$ W cm <sup>-1</sup> K <sup>-2</sup> |
|--------------------------------|-----------------------------------------------------------|---------------------------------------------------|------------------------------------------------------------------------------------|
| No                             | 0.37                                                      | 45.5                                              | 9.5                                                                                |
| 70                             | 0.27                                                      | 43.4                                              | 5.1                                                                                |
| 100                            | 0.37                                                      | 43.5                                              | 7.0                                                                                |
| 120                            | 0.71                                                      | 44.5                                              | 15.0                                                                               |
| 150                            | 0.49                                                      | 45.2                                              | 10.0                                                                               |
| 200                            | 0.14                                                      | 40.7                                              | 2.3                                                                                |

**Table S3.** Room temperature thermoelectric properties of PEDOT:PSS/Se films with different thicknesses.

| Average film thickness / $\mu$ m | Electrical Conductivity ( $\sigma$ ) / S cm <sup>-1</sup> | Seebeck Coefficient (S) / $\mu$ V K <sup>-1</sup> | Power Factor (S <sup>2</sup> $\sigma$ ) / $\mu$ W cm <sup>-1</sup> K <sup>-2</sup> |
|----------------------------------|-----------------------------------------------------------|---------------------------------------------------|------------------------------------------------------------------------------------|
| 1.4                              | 0.58                                                      | 43.2                                              | 10.8                                                                               |
| 3.0                              | 0.69                                                      | 45.0                                              | 14.0                                                                               |
| 4.5                              | 0.57                                                      | 44.9                                              | 11.5                                                                               |
